# Supplementary material for: Selective growth of pure magnetite thin films and/or nanowires grown in situ at a low temperature by pulsed laser deposition
Source: Royal Society of Chemistry journal article supplement (doi:10.1039/c2tc00672c), 2013-01-01
Supplement: c2tc00672c.pdf [file c2tc00672c.pdf]

## Selective growth of pure magnetite thin films and/or nanowires grown *in situ* at a low temperature by pulsed laser deposition

### Supplementary Information

Jong-Gu Yun,<sup>1</sup> Young-Mi Lee,<sup>2</sup> Won-Jae Lee,<sup>3</sup> Chang-Soo Kim,<sup>4</sup> and Soon-Gil Yoon<sup>1,\*</sup>

<sup>1</sup>*Department of Materials Engineering, Chungnam National University, Daeduk Science Town, 305-764, Daejeon, Korea*

<sup>2</sup>*Brain Korea 21 (BK21) and Department of Materials Engineering, Chungnam University, Daejeon, 305-764, Republic of Korea*

<sup>3</sup>*Department of Nano Technology, Dong-Eui University, Busan, 614-714, Korea*

<sup>4</sup>*Korea Research Institute of Standards and Science, Daejeon, 305-600, Korea*

\*Corresponding author: sgyoon@cnu.ac.kr

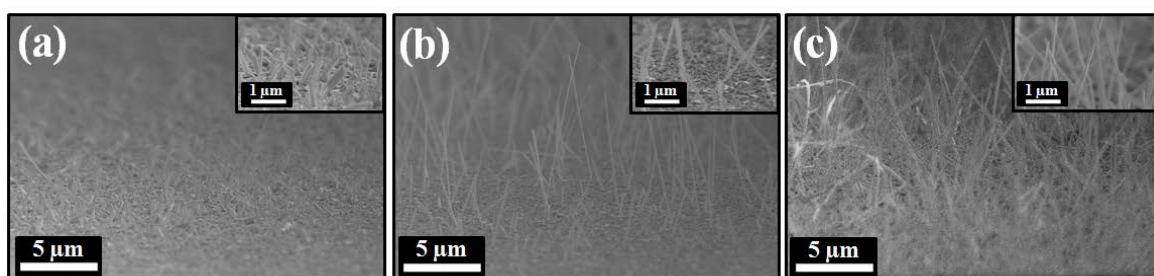

**Fig. S1** SEM tilted images (at low magnification) exhibiting the nanowires grown during the cooling over the films grown at (a) 610, (b) 620 and (c) 630 °C. Each insets showed the tilted images observed at high magnification.

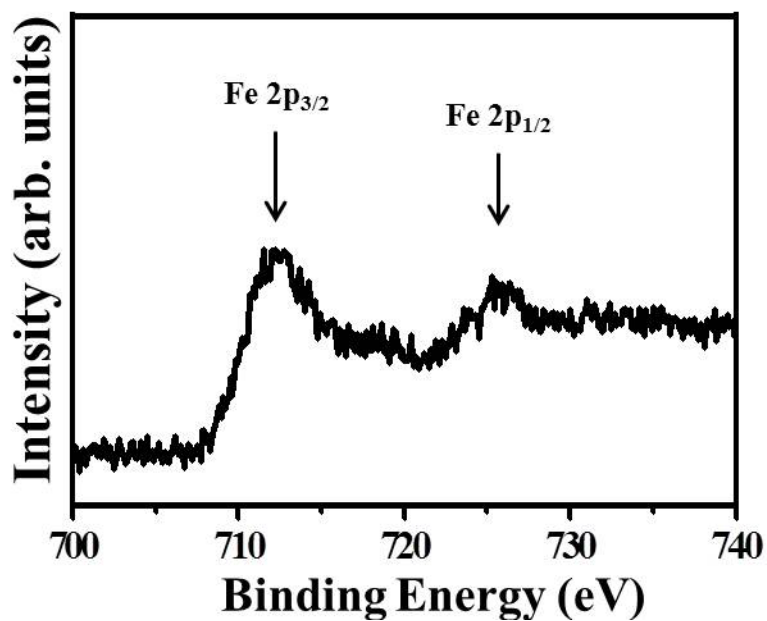

**Fig. S2** Fe 2p XPS measurement of the 110 nm-thick films.

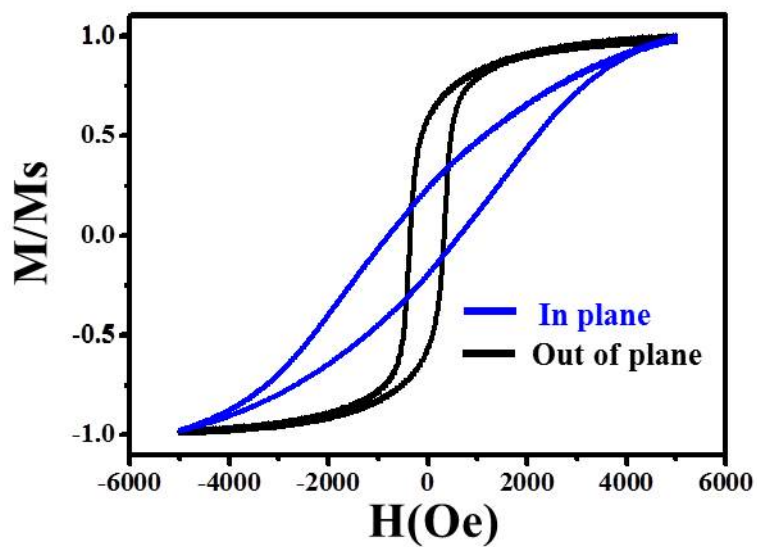

**Fig. S3** Magnetization-magnetic field ( $M-H$ ) curves of the films grown at 300 °C.
